# Supplementary material
Source: publisher site journal article supplement (https://www.dovepress.com/article/468598)

**Supplementary Table 1A.** Patients baseline details.

| Variable | total |
| --- | --- |
| Number of knees, n | 48 |
| Number of patients, n | 45 |
| Mean age, yrs. (SD) | 66.6（8.1） |
| Female, n (%) | 36（80.0） |
| Left Side, n (%) | 25（52.1） |
| Mean BMI, kg/m2 (SD) | 27.4（3.6） |
| preoperative mean absolute mechanical limb alignment, ° (SD) | 8.7（4.5） |

BMI, body mass index; SD, standard deviation.

**Supplementary Table 1B.** Patient demographic details (subgroup analysis).

| Variable | Surgeon 1 | Surgeon 2 | Surgeon 3 | *p value* |
| --- | --- | --- | --- | --- |
| Number of knees | 16 | 16 | 16 | NA |
| Mean age, yrs. (SD) | 67.7（9.4） | 64.8（8.6） | 67.3(6.1) | .583 |
| Female, n (%) | 12（80.0） | 11（73.3） | 13（86.7） | .659 |
| Left Side, n (%) | 8（50.0） | 8（50.0） | 9（56.3） | .167 |
| Mean BMI, kg/m2 (SD) | 27.1（3.1） | 26.9（3.6） | 28.2(4.0) | .556 |
| Preoperative mean absolute mechanical limb alignment, ° (SD) | 10.3（3.9） | 7.7（3.6） | 8.2(5.6) | .229 |

**Supplementary Figure 1** Accuracy of bone cuts and alignment for RATKA among surgeons.


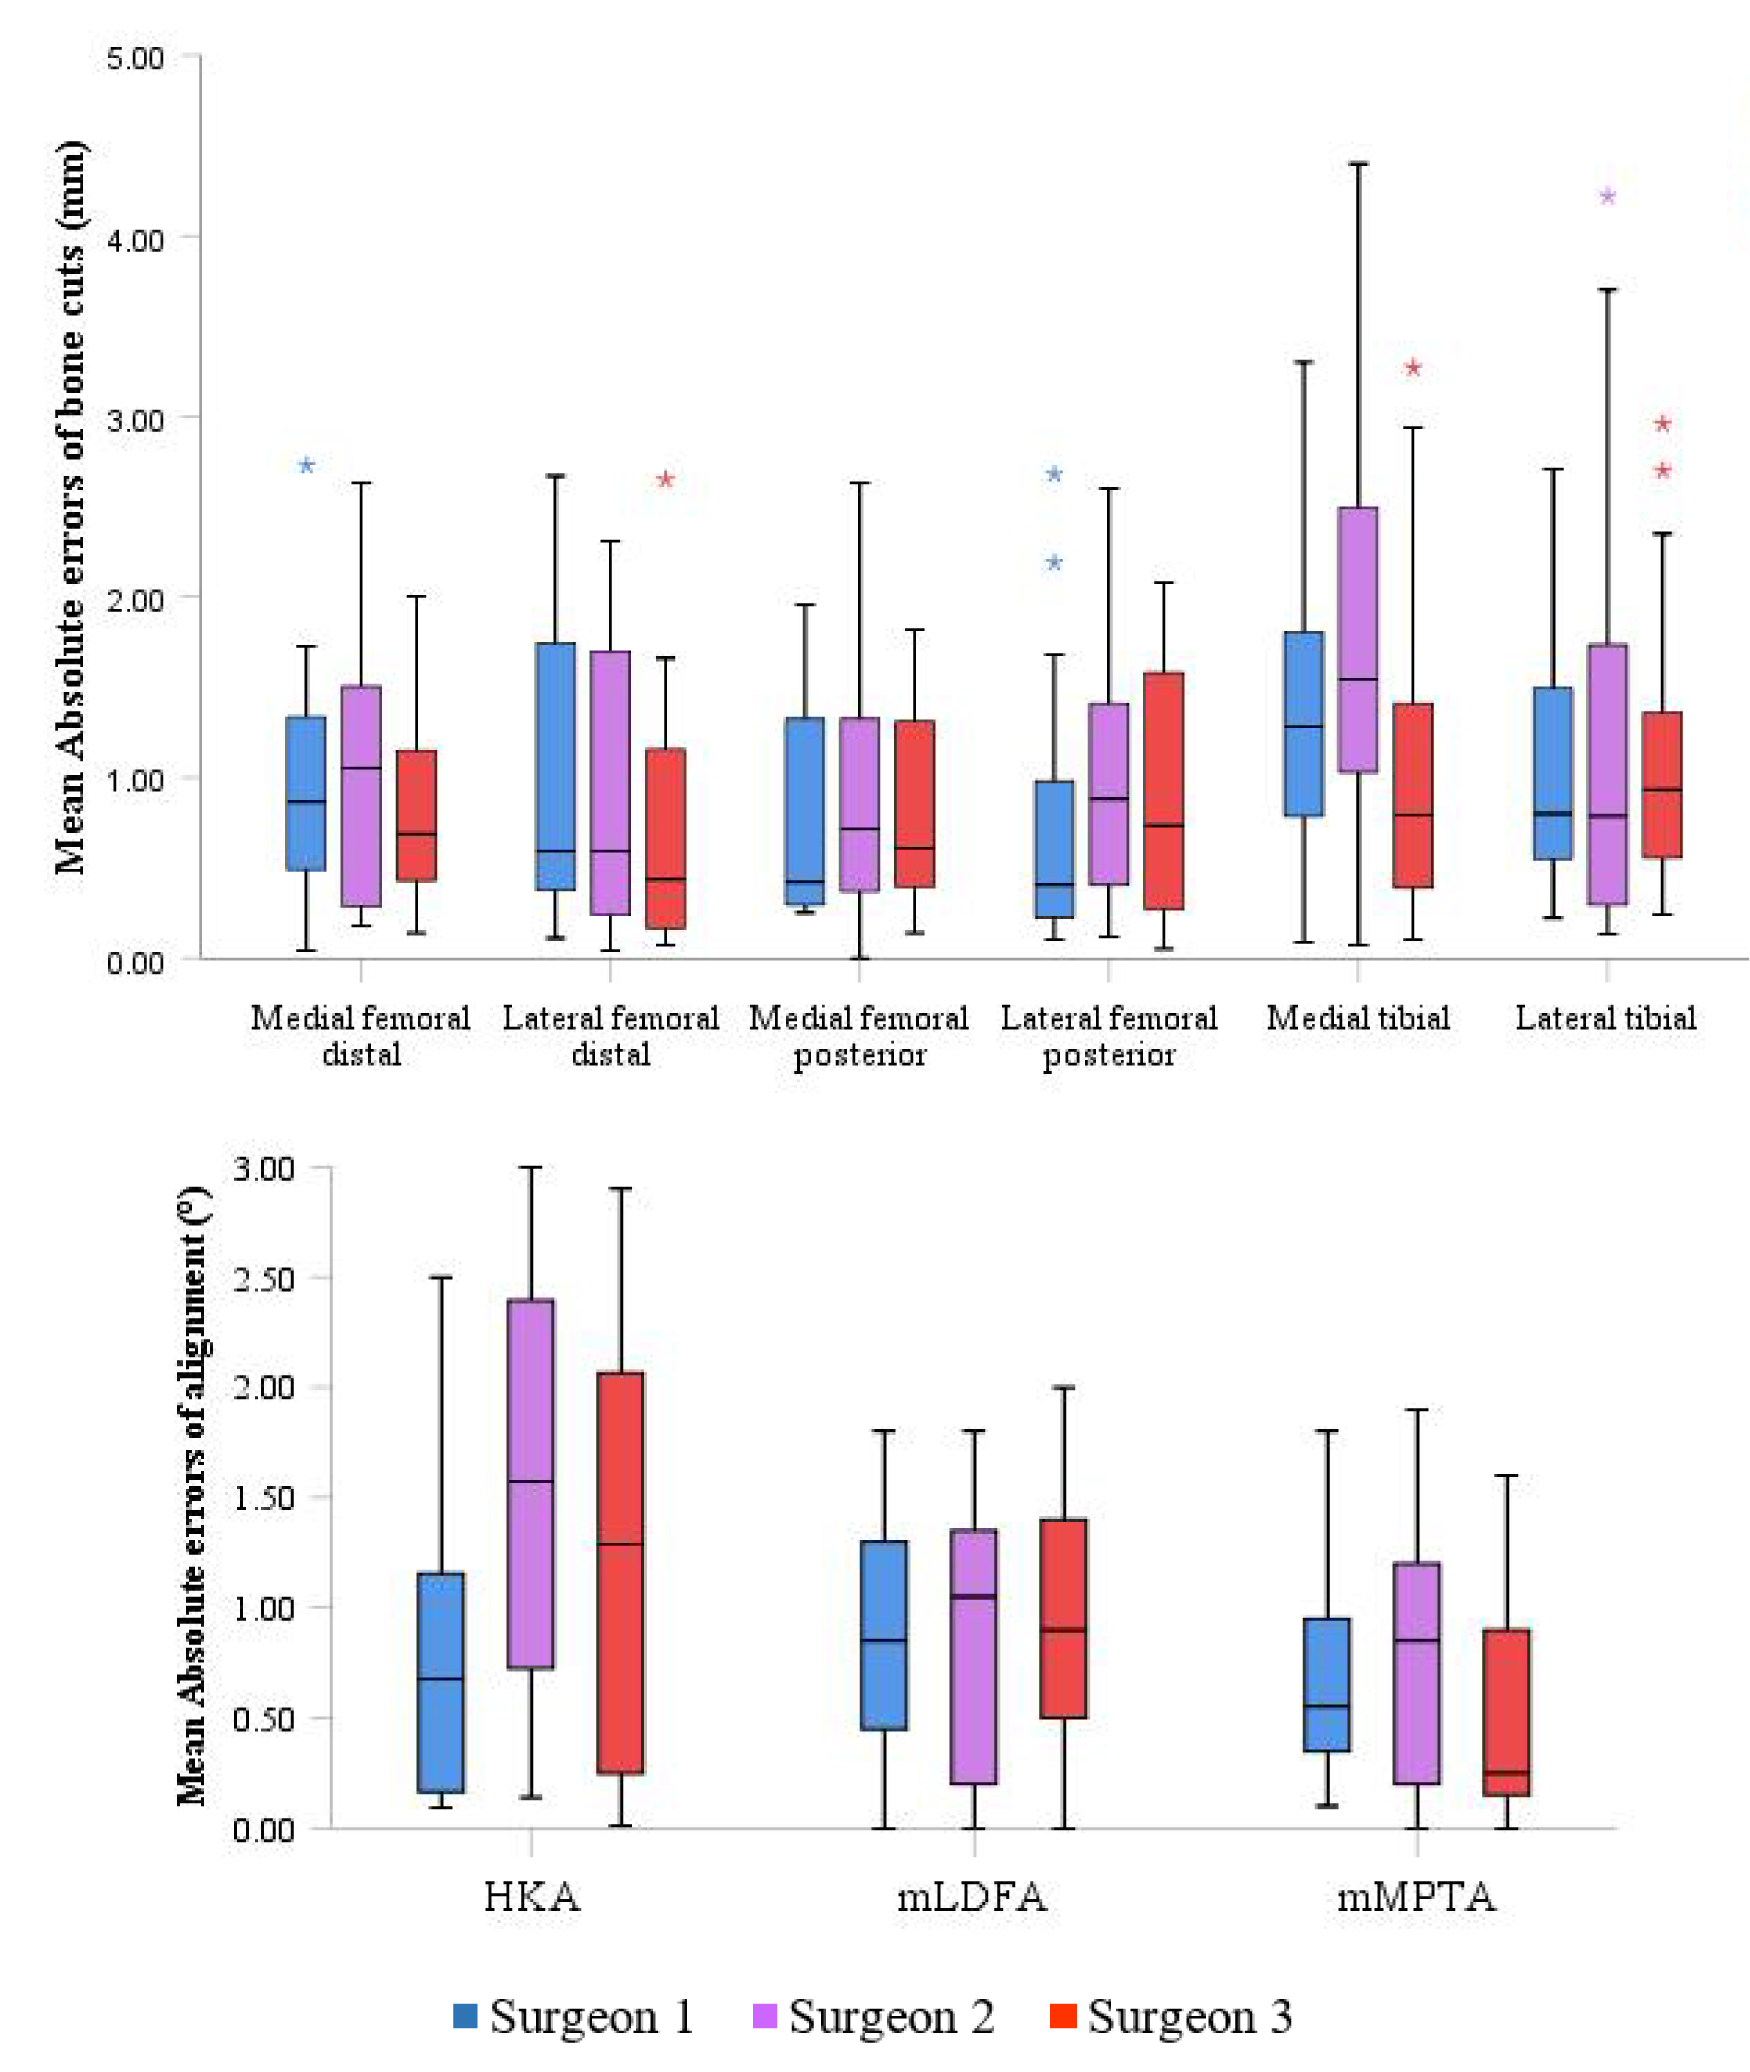

Supplement: Supplementary file 1 [file get_supplementary_file.php]
